# Supplementary material for: Identification of 1-Butyl-Lysergic Acid Diethylamide (1B-LSD) in Seized Blotter Paper Using an Integrated Workflow of Analytical Techniques and Chemo-Informatics
Source: MDPI journal article supplement (doi:10.3390/molecules25030712), 2020-02-07
Supplement: s1 [file s1]

# Identification of 1-butyl-d-lysergic acid diethylamide (1B-LSD) in seized blotted paper using an integrated workflow of analytical techniques and chemoinformatics

Emmanouil D. Tsochatzis<sup>1</sup>, Joao A. Lopes<sup>1, \*</sup>, Fabiano Reniero<sup>1</sup>, Margaret V. Holland<sup>1</sup>, Jenny Åberg<sup>2</sup> and Claude Guillou<sup>1</sup>

## Supplementary material

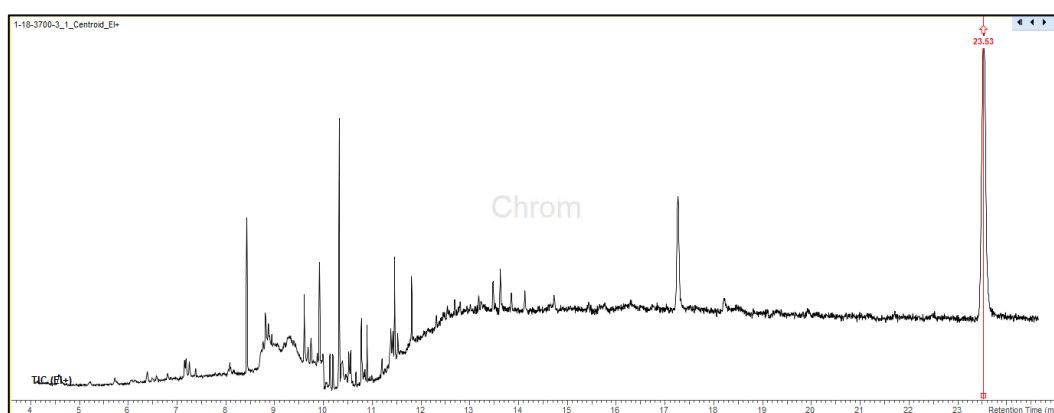

**Figure S1** - GC chromatogram analysis (Full scan mode) of the the blotter paper methanol extract

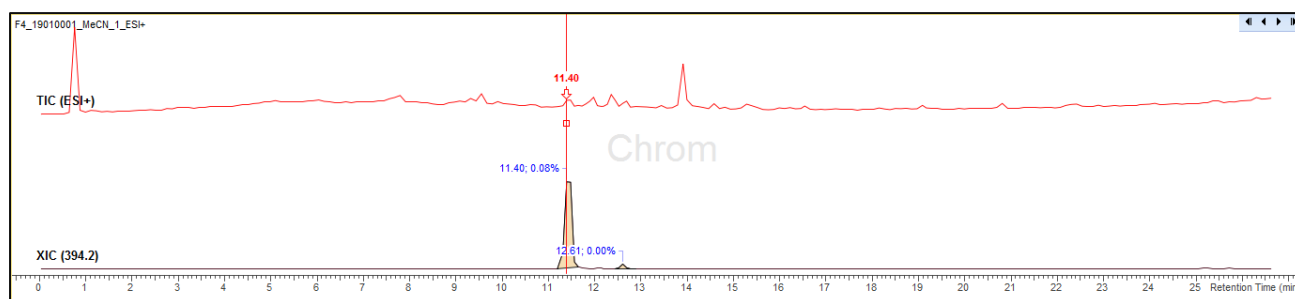

**Figure S2** - UHPLC-qTOF-MS analysis of the blotter paper methanol extract (A) and the extracted ion chromatogram (XIC) of the 1B-LSD  $[M+H]^+$

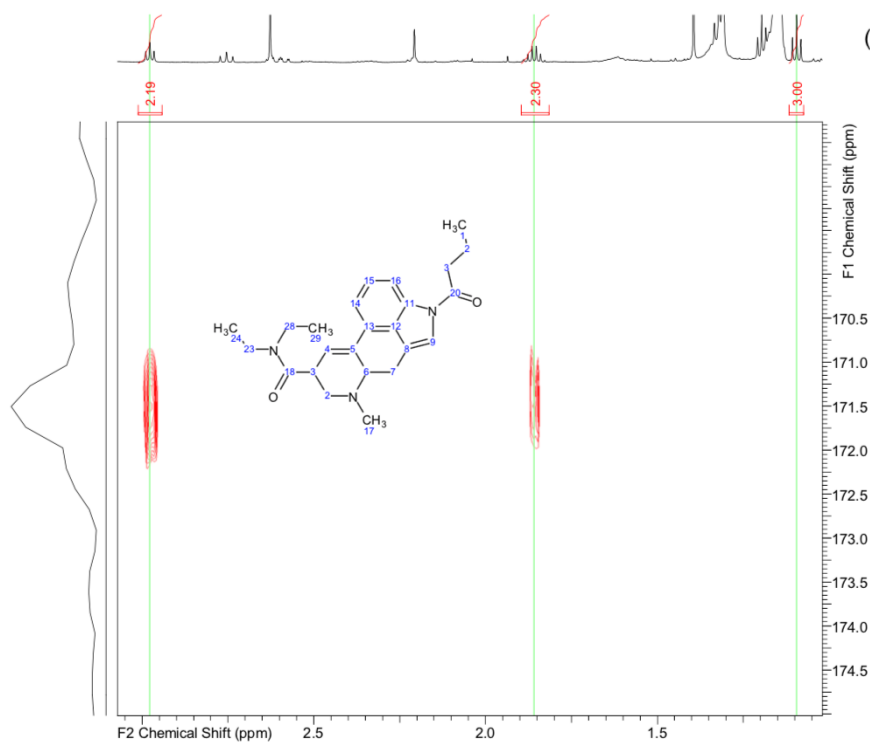

**Figure S3 - HMBC NMR spectra of the blotter paper methanol extract**

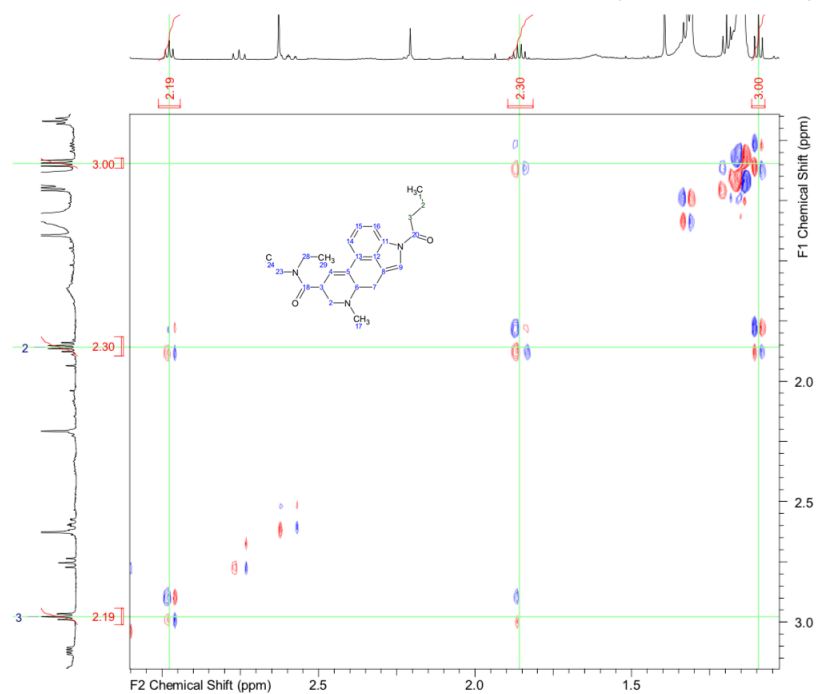

**Figure S4- 2D COSY NMR spectra of the blotter paper methanol extract**
